# Supplementary material for: Evaluation of transition metal phosphides supported on ordered mesoporous materials as catalysts for phenol hydrodeoxygenation
Source: Royal Society of Chemistry journal article supplement (doi:10.1039/c5gc02188j), 2015-11-23
Supplement: c5gc02188j1.pdf [file c5gc02188j1.pdf]

**Table S1:** NH<sub>3</sub>-TPD measurements of supports and passivated metal phosphides supported catalysts.

|                                  | Acidity<br>(mmol NH <sub>3</sub> /g) |
|----------------------------------|--------------------------------------|
| m-Al <sub>2</sub> O <sub>3</sub> | 0.46                                 |
| Al-SBA-15                        | 0.11                                 |
| Ni <sub>2</sub> P/Al-SBA-15      | 0.43                                 |
| Co <sub>2</sub> P/Al-SBA-15      | 0.24                                 |
| MoP/Al-SBA-15                    | 0.64                                 |

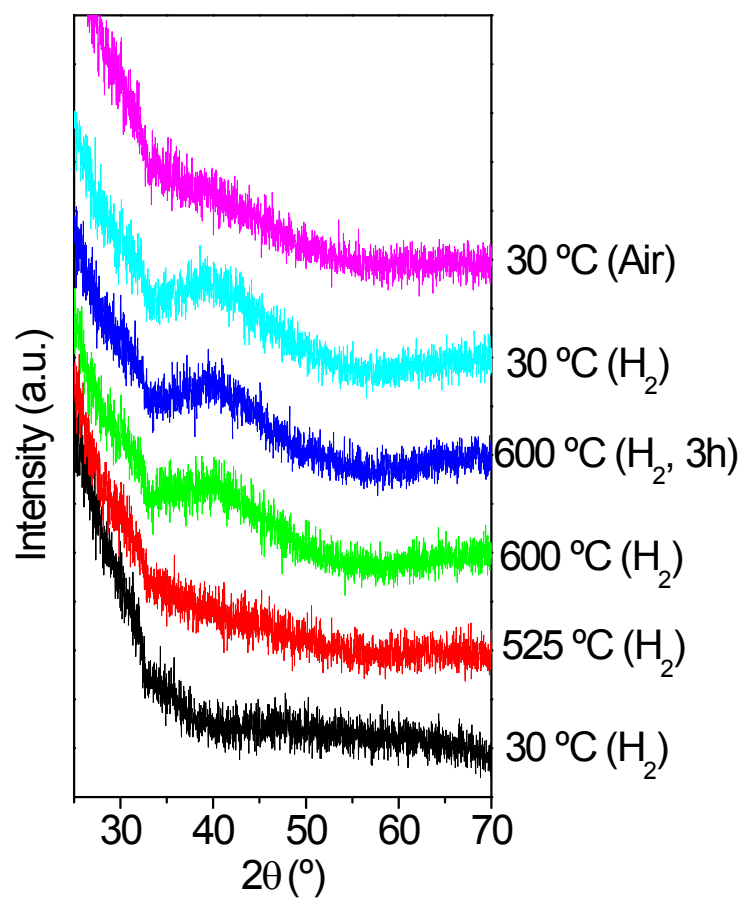

**Fig S1:** In situ X-ray diffraction analyses using a temperature chamber for calcined MoP/Al-SBA-15.
